# Supplementary material
Source: PubMed Central journal article supplement (PMC8238895)
Supplement: NIHMS1709169-supplement-Supplementary_Figures.pdf [file NIHMS1709169-supplement-Supplementary_Figures.pdf]

# Supporting Information

## **The Misfolding and Self-assembly Dynamics of Microtubule-binding Repeats of the Alzheimer-related Protein Tau**

Huan He<sup>1</sup>, Yuying Liu<sup>1</sup>, Yunxiang Sun<sup>1,2\*</sup>, and Feng Ding<sup>2\*</sup>

<sup>1</sup> School of Physical Science and Technology, Ningbo University, Ningbo 315211, China

<sup>2</sup> Department of Physics and Astronomy, Clemson University, Clemson, SC 29634, United States

\*E-mail: [sunyunxiang@nbu.edu.cn](mailto:sunyunxiang@nbu.edu.cn), [fding@clemson.edu](mailto:fding@clemson.edu)

**Table S1.** The average secondary structure contents of unstructured (coil and bend),  $\beta$ -sheet, helix and turn conformation for each repeat in one- and two-peptide simulation during last 400 ns and 800 ns .

| System |           | Coil&Bend | $\beta$ -sheet | Helix | Turn  |
|--------|-----------|-----------|----------------|-------|-------|
| R1     | 1-peptide | 0.771     | 0.034          | 0.107 | 0.088 |
|        | 2-peptide | 0.760     | 0.051          | 0.103 | 0.086 |
| R2     | 1-peptide | 0.779     | 0.045          | 0.092 | 0.084 |
|        | 2-peptide | 0.747     | 0.106          | 0.072 | 0.075 |
| R3     | 1-peptide | 0.750     | 0.183          | 0.005 | 0.062 |
|        | 2-peptide | 0.599     | 0.346          | 0.004 | 0.051 |
| R4     | 1-peptide | 0.717     | 0.069          | 0.131 | 0.083 |
|        | 2-peptide | 0.683     | 0.124          | 0.114 | 0.079 |

**Table S2** The probability distribution of monomer and dimer in two-peptide simulation for each repeat.

| Oligomer | R1    | R2    | R3    | R4    |
|----------|-------|-------|-------|-------|
| Monomer  | 0.531 | 0.501 | 0.012 | 0.453 |
| Dimer    | 0.469 | 0.499 | 0.988 | 0.547 |

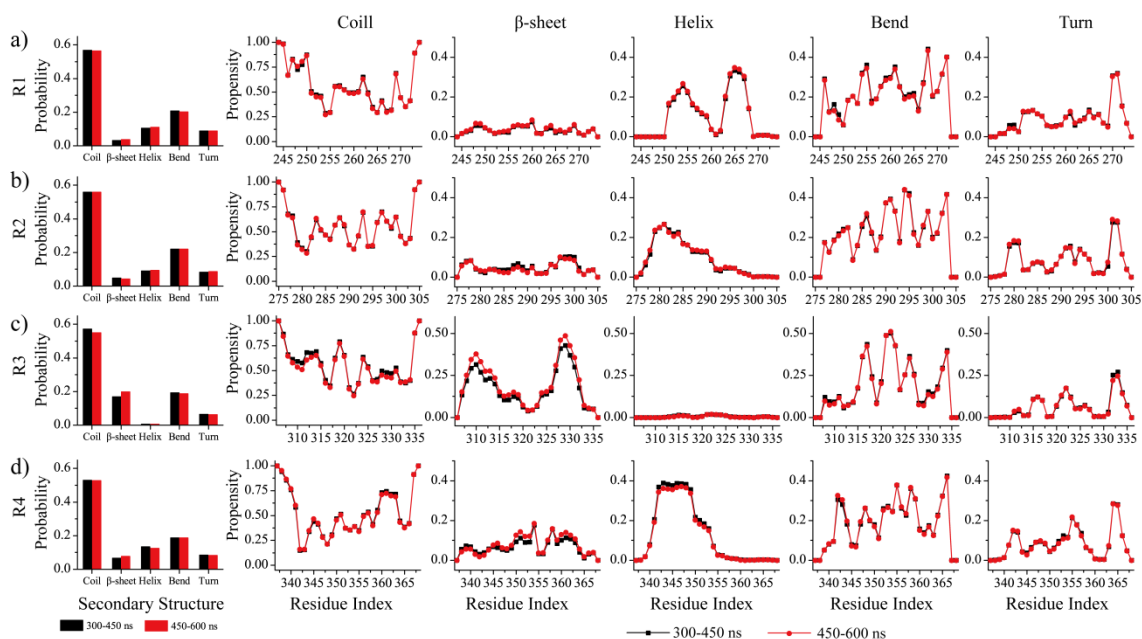

**Figure S1. The convergence assessments for the single-peptide simulation of each repeat.** The averaged secondary structure probability for each repeat and the propensity of each residue from every repeat adopting different secondary structures using 300-450 ns (black) and 450-600 ns (red) intervals.

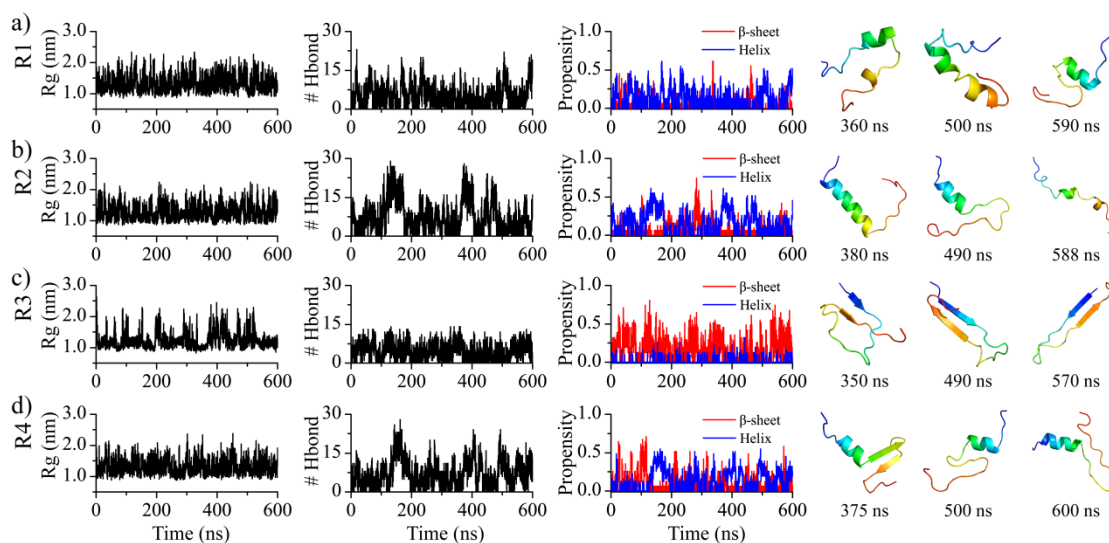

**Figure S2. The conformational sampling efficiency assessments for the single-peptide simulation of each repeat.** The time evolution of radius gyration ( $R_g$ ), number of hydrogen bonds formed by main-chain atoms ( $\#Hbond$ ), and  $\beta$ -sheet and helix structure content for each monomer repeat. Three well-defined transient structures were also presented on the left. For each molecular system only one trajectory were selected from 40 independent DMD runs.

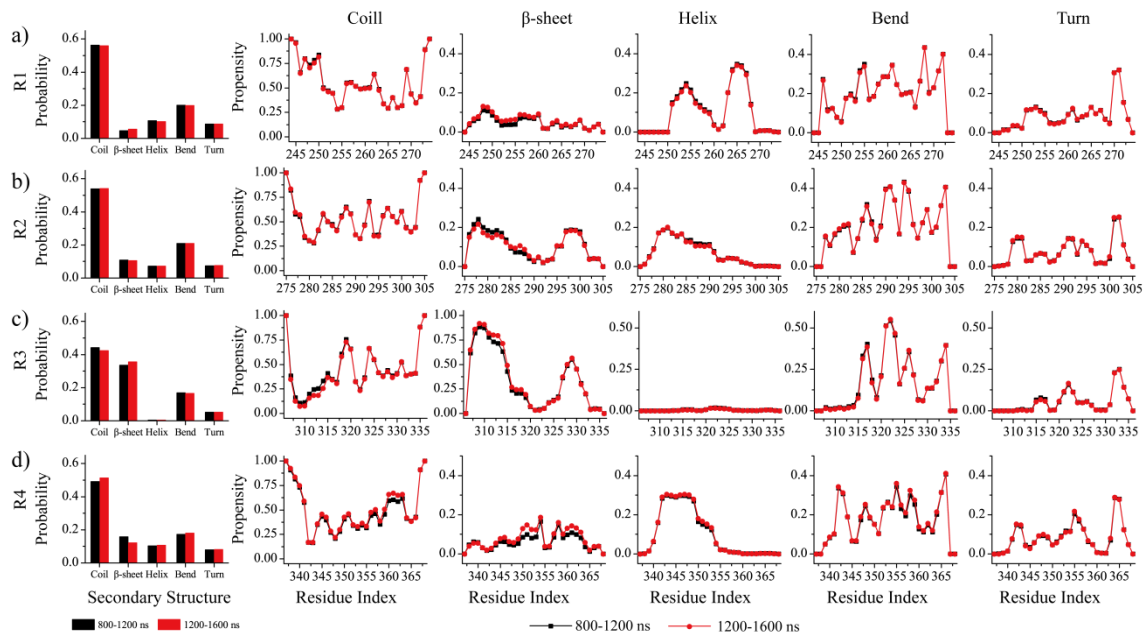

**Figure S3. Simulation convergence assessments for two-peptide simulations of each repeat.** The average secondary structure probability of each repeat and the secondary structure propensity of each amino acid from every repeat based on the conformations generated within 800-1200 and 1200-1600 ns time intervals.

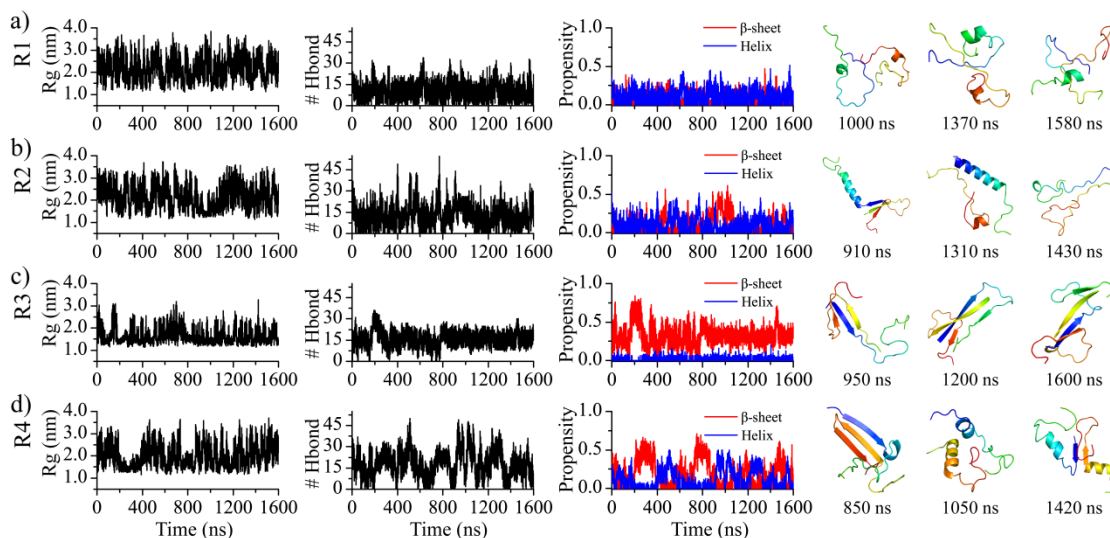

**Figure S4. The conformational sampling efficiency assessments for the two-peptide simulation of each repeat.** The time evolution of radius gyration ( $R_g$ ), number of hydrogen bonds formed by main-chain atoms ( $\#Hbond$ ), and  $\beta$ -sheet and helix structure content for each monomer repeat. Three well-defined transient structures were also presented on the left. For each molecular system only one trajectory were selected from 40 independent DMD runs

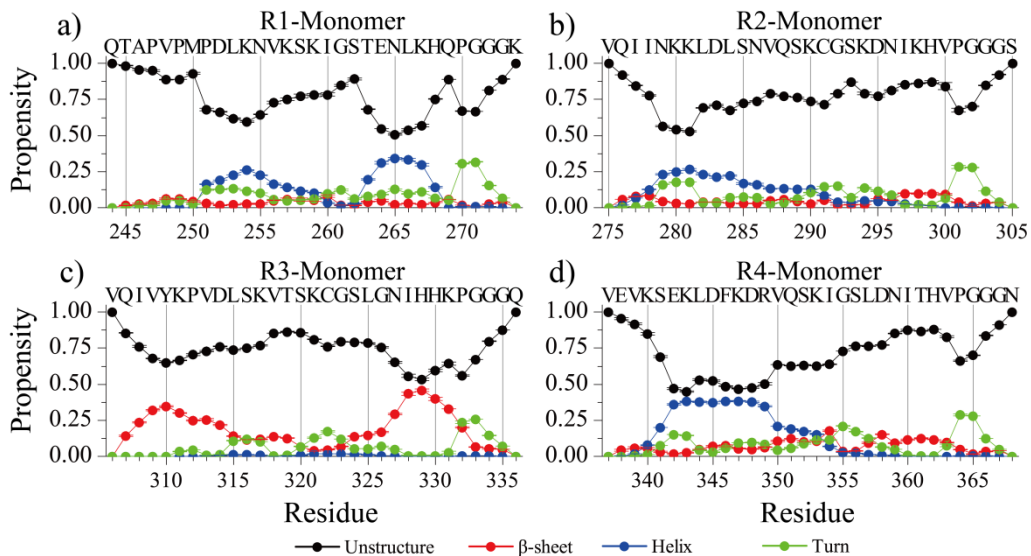

**Figure S5. Secondary structure analysis.** The averaged propensity of each residue from every tau repeat adopted unstructured (random coil and bend),  $\beta$ -sheet, helix and turn conformation in single-repeat simulation during 400-800 ns (a-d).

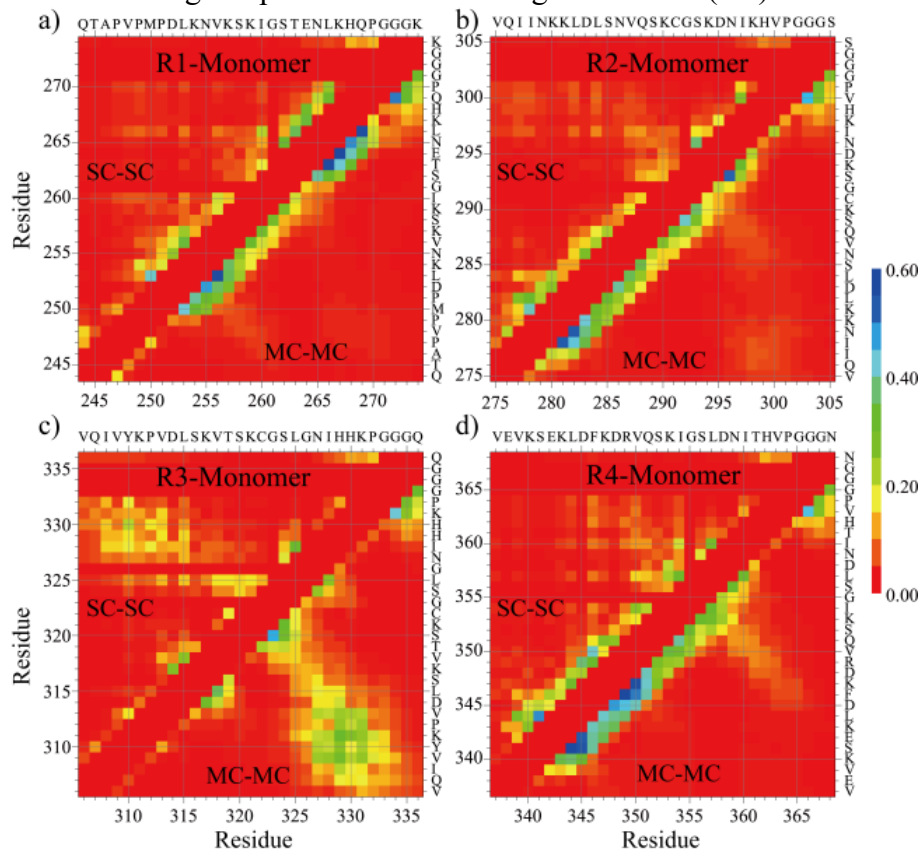

**Figure S6. The residue-pairwise interaction analysis.** The residue-pairwise inter-molecular contact frequency maps were computed both between main-chain atoms (MC-MC) and between side-chain atoms (SC-SC) in the single-peptides DMD simulations of each repeat. Only the last 400 ns of each 800 ns independent simulation was used for analysis.

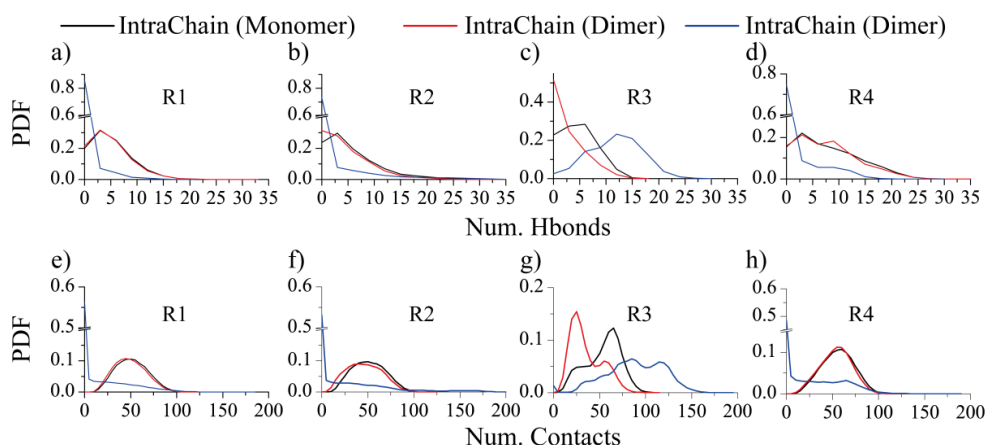

**Figure S7. Hydrogen bonds and contact analysis.** The probability distribution of the number of hydrogen bonds formed by main-chain atom (a-d) and residue-pairwise contact formed by heavy atoms (e-h) for each type of repeat. The trajectories during 400~800 ns from the single-peptide simulation were used to calculate the number of hydrogen bonds and contacts. For the two-peptide systems, the number of inter-molecular hydrogen bonds and contacts per chain, and inter-chain hydrogen bonds and contacts were calculated using the last 800 ns from 1600 ns from each two-peptide simulation.

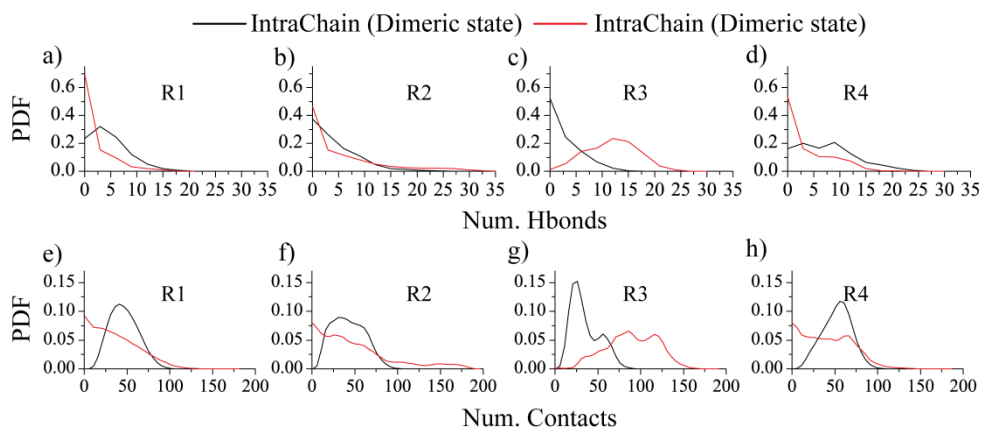

**Figure S8. Hydrogen bonds and contact analysis of each repeat in dimeric state.** The probability distribution of the number of hydrogen bonds formed by main-chain atoms (a-d) and residue-pairwise contact formed by heavy atoms (e-h) for each type of repeat. For each repeat, only the dimeric conformations, where two peptides were connected by at least one inter-molecular contact, were considered during the 800 ns from 1600 ns DMD simulations.

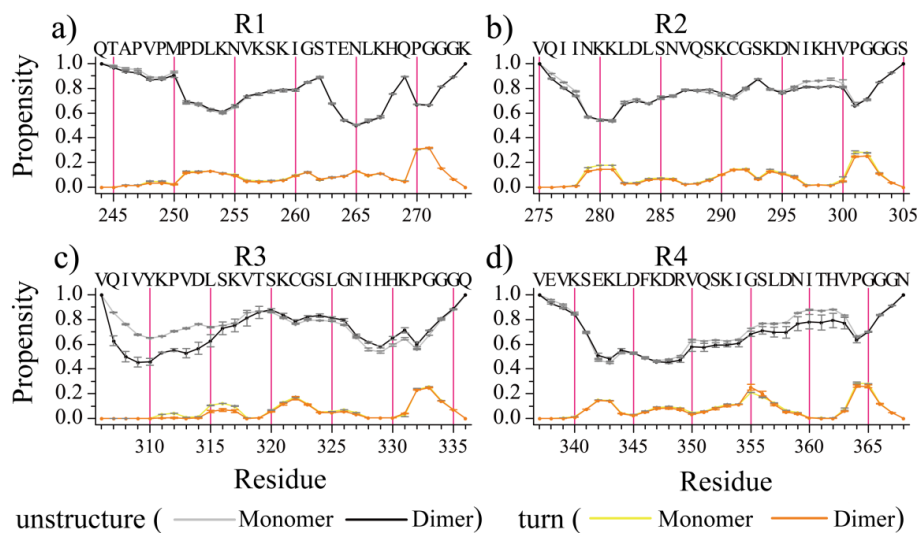

**Figure S9. Secondary structure analysis.** The averaged propensity of each residue from every tau repeat adopted unstructured and turn conformation in one- and two-peptides DMD simulation.
